# Supplementary material for: Five-year change in refractive error and its risk factors: results from the Gutenberg Health Study
Source: HighWire-hosted journal article supplement (doi:10.1136/bjophthalmol-2021-318828), 2021-08-06
Supplement: bjophthalmol-2021-318828supp001_data_supplement.pdf [file bjophthalmol-2021-318828supp001_data_supplement.pdf]

**Supplementary material****Supplementary Table 1: Association analysis for myopic 5-year change in spherical equivalent (more than -0.5D) in phakic eyes. Data from the German population-based Gutenberg Health Study (2007-2017).**

Multivariable logistic regression analysis with generalized estimating equations was conducted.

| <i>(n=15,836 eyes)</i>                                    | <i>OR</i> | <i>95%-CI</i>    | <i>P</i>         |
|-----------------------------------------------------------|-----------|------------------|------------------|
| Sex [female]                                              | 1.49      | 1.28; 1.73       | <b>&lt;0.001</b> |
| Age [per year]                                            |           |                  |                  |
| Linear term                                               | 0.52      | 0.49; 0.55       | <b>&lt;0.001</b> |
| Quadratic term                                            | 1.01      | 1.01; 1.01       | <b>&lt;0.001</b> |
| <i>Cardiovascular parameters</i>                          |           |                  |                  |
| HbA1c [%]                                                 | 1.07      | 0.95; 1.20       | 0.27             |
| HDL-cholesterol [mg/dl]                                   | 1.00      | 0.99; 1.00       | 0.75             |
| LDL-cholesterol [mg/dl]                                   | 1.00      | 1.00; 1.00       | 0.81             |
| Triglycerides [mg/dl]                                     | 1.00      | 1.00; 1.00       | 0.33             |
| BMI [kg/m <sup>2</sup> ]                                  | 1.00      | 0.98; 1.01       | 0.86             |
| Physical activity                                         | 1.00      | 1.00; 1.00       | 0.28             |
| <i>Smoking history</i>                                    |           |                  |                  |
| Non-smoker                                                |           | <i>Reference</i> |                  |
| Smoker                                                    | 0.96      | 0.80; 1.16       | 0.70             |
| Occasional smoker                                         | 0.91      | 0.58; 1.44       | 0.70             |
| Former smoker                                             | 1.10      | 0.95; 1.26       | 0.19             |
| <i>Ocular parameters</i>                                  |           |                  |                  |
| Spherical equivalent [D]                                  | 0.89      | 0.87; 0.91       | <b>&lt;0.001</b> |
| IOP [mmHg]                                                | 1.01      | 0.99; 1.03       | 0.54             |
| Lens opacity                                              | 1.09      | 0.91; 1.30       | 0.36             |
| <i>Education</i>                                          |           |                  |                  |
| Secondary general school („Hauptschule“)                  |           | <i>Reference</i> |                  |
| Intermediate school („Realschule“)                        | 0.96      | 0.81; 1.14       | 0.64             |
| High school („Abitur“)                                    | 0.96      | 0.81; 1.12       | 0.58             |
| Others                                                    | 0.52      | 0.17; 1.57       | 0.25             |
| None                                                      | 0.91      | 0.28; 2.94       | 0.88             |
| <i>Occupation</i>                                         |           |                  |                  |
| Housemaker, retired or none                               |           | <i>Reference</i> |                  |
| Agriculture, forestry, animal husbandry and horticulture  | 1.11      | 0.69; 1.78       | 0.67             |
| Production and manufacturing                              | 0.89      | 0.67; 1.18       | 0.42             |
| Construction and architecture                             | 1.06      | 0.70; 1.60       | 0.78             |
| Natural and computer science                              | 1.09      | 0.79; 1.51       | 0.61             |
| Transport, logistics, security and military               | 1.20      | 0.87; 1.64       | 0.26             |
| Commercial services and tourism                           | 1.02      | 0.76; 1.36       | 0.90             |
| Business organization, accounting, law and administration | 0.96      | 0.78; 1.18       | 0.70             |
| Health and education                                      | 0.82      | 0.65; 1.05       | 0.12             |
| Humanities, media and culture                             | 0.81      | 0.55; 1.20       | 0.29             |
