# Supplementary material for: Five-year change in refractive error and its risk factors: results from the Gutenberg Health Study
Source: HighWire-hosted journal article supplement (doi:10.1136/bjophthalmol-2021-318828), 2021-08-06
Supplement: bjophthalmol-2021-318828supp002_data_supplement.pdf [file bjophthalmol-2021-318828supp002_data_supplement.pdf]

**Supplemental material****Supplementary Table 2: Association analysis for hyperopic 5-year change in spherical equivalent (more than 0.5D) in phakic eyes. Data from the German population-based Gutenberg Health Study (2007-2017).**

Multivariable logistic regression analysis with generalized estimating equations was conducted.

| <i>(n=15,836 eyes)</i>                                    | <i>OR</i> | <i>95%-CI</i>    | <i>P</i>         |
|-----------------------------------------------------------|-----------|------------------|------------------|
| Sex [female]                                              | 0.97      | 0.86; 1.09       | 0.57             |
| Age [per year]                                            |           |                  |                  |
| Linear term                                               | 1.62      | 1.52; 1.72       | <b>&lt;0.001</b> |
| Quadratic term                                            | 1.00      | 1.00; 1.00       | <b>&lt;0.001</b> |
| <i>Cardiovascular parameters</i>                          |           |                  |                  |
| HbA1c [%]                                                 | 0.98      | 0.92; 1.09       | 0.95             |
| HDL-cholesterol [mg/dl]                                   | 1.00      | 1.00; 1.00       | 0.74             |
| LDL-cholesterol [mg/dl]                                   | 1.00      | 1.00; 1.00       | 0.51             |
| Triglycerides [mg/dl]                                     | 1.00      | 1.00; 1.00       | 0.66             |
| BMI [kg/m <sup>2</sup> ]                                  | 1.00      | 0.99; 1.01       | 0.83             |
| Physical activity                                         | 1.00      | 1.00; 1.00       | 0.73             |
| <i>Smoking history</i>                                    |           |                  |                  |
| Non-smoker                                                |           | <i>Reference</i> |                  |
| Smoker                                                    | 1.31      | 1.14; 1.50       | <b>&lt;0.001</b> |
| Occasional smoker                                         | 1.11      | 0.69; 1.42       | 0.95             |
| Former smoker                                             | 1.03      | 0.98; 1.21       | 0.13             |
| <i>Ocular parameters</i>                                  |           |                  |                  |
| Spherical equivalent [D]                                  | 0.99      | 0.97; 1.01       | 0.50             |
| IOP [mmHg]                                                | 0.99      | 0.97; 1.00       | 0.06             |
| Lens opacity                                              | 1.02      | 0.91; 1.16       | 0.70             |
| <i>Education</i>                                          |           |                  |                  |
| Secondary general school („Hauptschule“)                  |           | <i>Reference</i> |                  |
| Intermediate school („Realschule“)                        | 1.11      | 0.98; 1.26       | 0.10             |
| High school („Abitur“)                                    | 1.03      | 0.91; 1.16       | 0.67             |
| Others                                                    | 0.64      | 0.27; 1.52       | 0.31             |
| None                                                      | 1.20      | 0.44; 3.27       | 0.72             |
| <i>Occupation</i>                                         |           |                  |                  |
| Housemaker, retired or none                               |           | <i>Reference</i> |                  |
| Agriculture, forestry, animal husbandry and horticulture  | 0.85      | 0.58; 1.22       | 0.37             |
| Production and manufacturing                              | 0.94      | 0.75; 1.17       | 0.56             |
| Construction and architecture                             | 0.99      | 0.73; 1.33       | 0.93             |
| Natural and computer science                              | 1.28      | 1.00; 1.64       | 0.05             |
| Transport, logistics, security and military               | 0.97      | 0.75; 1.26       | 0.83             |
| Commercial services and tourism                           | 0.93      | 0.75; 1.16       | 0.53             |
| Business organization, accounting, law and administration | 1.17      | 1.00; 1.37       | 0.05             |
| Health and education                                      | 1.01      | 0.85; 1.22       | 0.88             |
| Humanities, media and culture                             | 1.10      | 0.81; 1.49       | 0.54             |
